# Supplementary material for: Ultrasound of the Uterosacral Ligament, Parametrium, and Paracervix: Disagreement in Terminology between Imaging Anatomy and Modern Gynecologic Surgery
Source: MDPI journal article supplement (doi:10.3390/jcm10030437), 2021-01-23
Supplement: s1 [file s1]

**Video S1.** Ultrasound visualization during surgery of the uterosacral ligament, paracervix, and parametrium.

The hyperechoic line (arrow) is the suture that was placed on the uterosacral ligament.

Abbreviations: C, cervix; PC, paracervix; PM, parametrium; USL, uterosacral ligament; V, vagina wall.

**Video S2.** Displacement of the uterosacral ligament during the ultrasound when the probe is strongly pushed.

**Video S3.** Visualization of the small vessels within the lowest part of the uterosacral ligament using color Doppler.
